# Supplementary material for: Localization of protoporphyrin IX in glioma patients with paired stimulated Raman histology and two-photon excitation fluorescence microscopy
Source: Research Square preprint supplement (doi:10.21203/rs.3.rs-1519287/v1), 2022-12-22
Supplement: Supplementary file 1 [file d84a3185d7a8abcdb68f9c56.pdf]

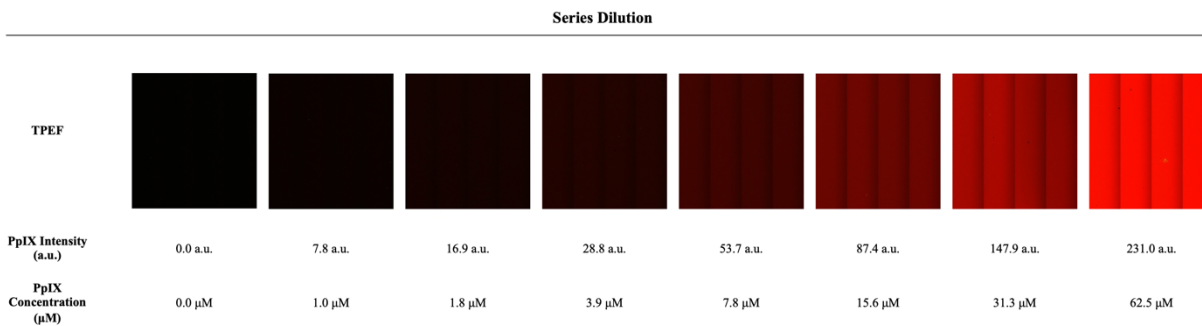

**Supplementary Fig. 1 | TPEF imaging of serial dilutions of PpIX.** Serial dilutions of PpIX ranging from 0 to 62.5 micrograms/mL were imaged with TPEF imaging. The measured fluorescence intensity of the PpIX serial dilutions shows a direct relationship between fluorescence intensity and PpIX concentration.

Comparison of Single Photon and Two Photon Fluorescence Microscopy Within t

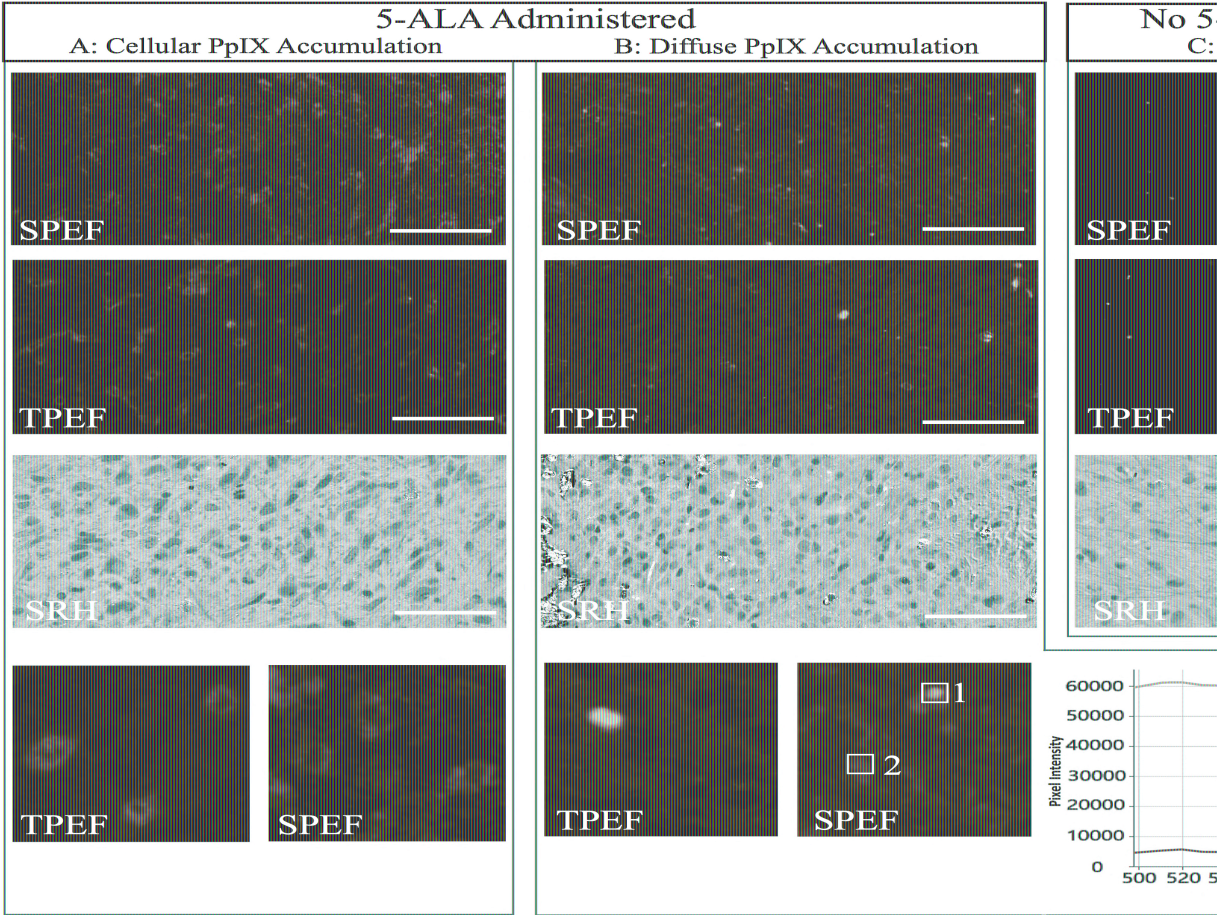

**Supplementary Fig. 2 | SPEF/TPEF.** Surgical specimens from 6 glioblastoma patients treated with 5-ALA and one control were collected and evenly divided for imaging with SPEF (Zeiss LSM 880) and TPEF (NIO Imaging system). Each panel labeled SPEF is created by overlaying the 636nm emission channel (PpIX) with the 564nm emission channel (autofluorescence). Panel A demonstrates an example of PpIX accumulation in a cellular pattern as imaged with SPEF and TPEF. SRH reveals that a limited fraction of imaged cells concentrate PpIX in the cytoplasm. High magnification field of view (73x73 microns) reveals bright cytoplasmic signal with dark nuclei indicating cytoplasmic accumulation of PpIX. Panel B demonstrates a diffuse dim pattern of PpIX accumulation with largely homogenous accumulation of PpIX in the imaged tissue. There are some intensely fluorescence structures in both the SPEF and TPEF images. A multispectral analysis of representative regions labeled 1 and 2 demonstrate the spectral differences. Region 1 demonstrates fluorescence intensity that is uniform from 500-580nm with a gradual decay as the emission is measured towards the infrared end of the spectrum. Region 2 demonstrates peak emission at 636nm in a pattern that is characteristic of PpIX. Demonstrating the appearance of tissue when 5-ALA is not administered, panel C reveals a modest degree of speckle fluorescence without appreciable signal at 636nm.

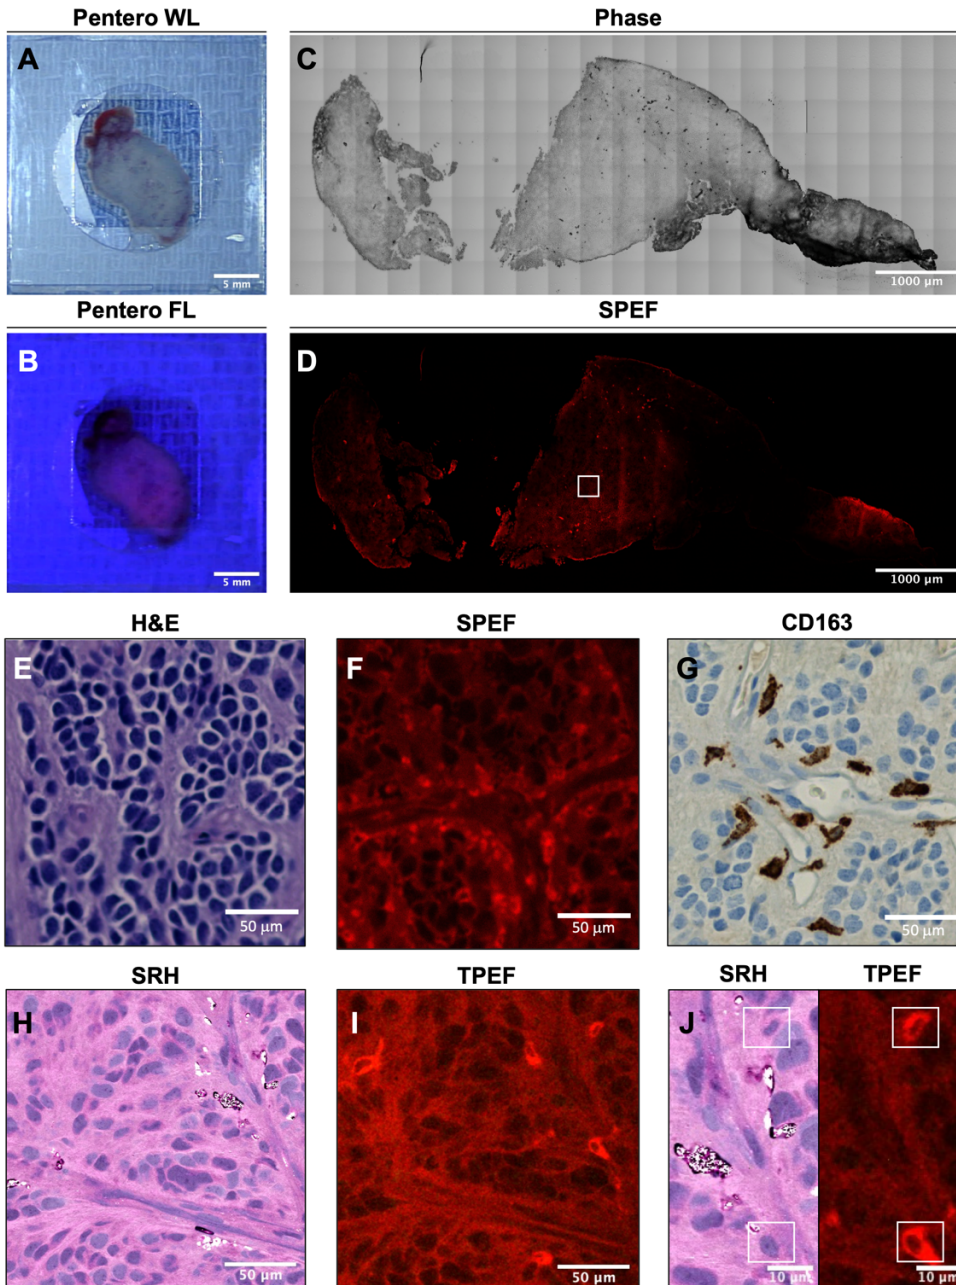

**Supplementary Fig. 3 | Comparison of SPEF and TPEF.** A fluorescing tumor specimen was viewed with white light (WL) (a) and blue light (b) under the Zeiss Pentero surgical microscope in the operating room (patient 45). A cryosection from the same specimen was created and imaged with phase-contrast microscopy (c) and single photon excitation fluorescence microscopy (d). The section was stained with H&E and shows a high density of tumor cells (e). A small subset of cells accumulate PpIX within the cytoplasm in the section imaged with single photon microscopy (f). A section stained with CD163 demonstrates a similar density of positive cells when compared to fluorescing cells in (f). SRH imaging of the same specimen (h) shows highly dense tumor with morphology mirroring the H&E section (d). Two-photon excitation fluorescence microscopy of the specimen also shows a small subset of cells with PpIX accumulation in the cytoplasm consistent with (f) and (g). High magnification comparison of SRH and TPEF imaging reveals that cells with cytoplasmic accumulation of PpIX are morphologically similar to histiocytes in (g).

PpIX Photobleaching With SPEF Over Time

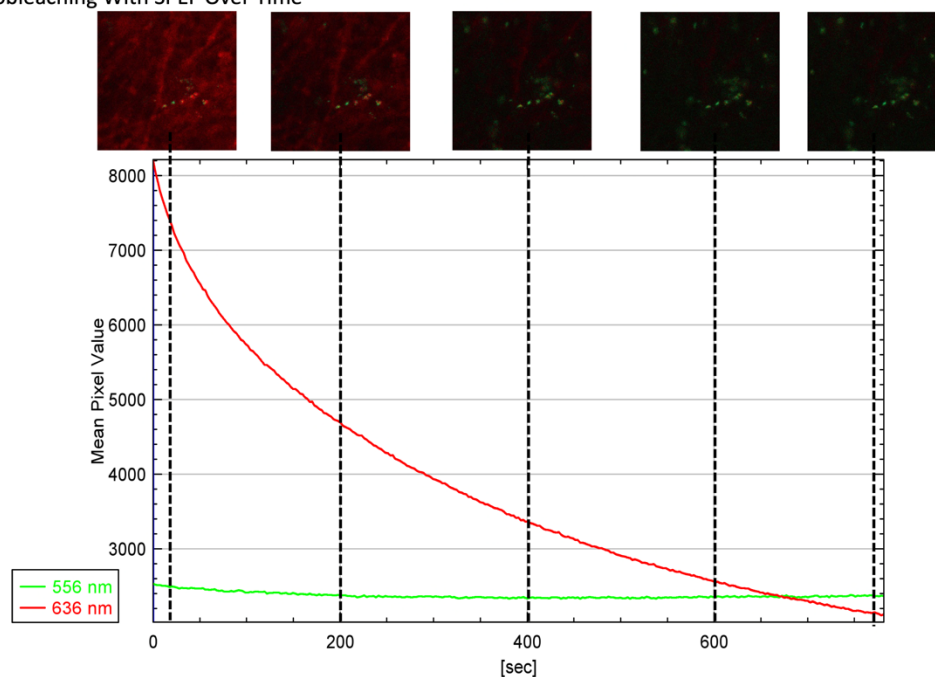

**Supplementary Fig. 4 | Photobleaching of PpIX with SPEF imaging.** Unprocessed tissue from a 5-ALA-treated GBM patient was subjected to a photobleaching experiment demonstrated here. Laser focus was established in the field of view shown and the tissue was exposed to 405nm excitation over 13 minutes. Over time the 636nm signal characteristic of PpIX decays in an exponential fashion while the 556nm signal, characteristic of autofluorescence, remains constant over time.



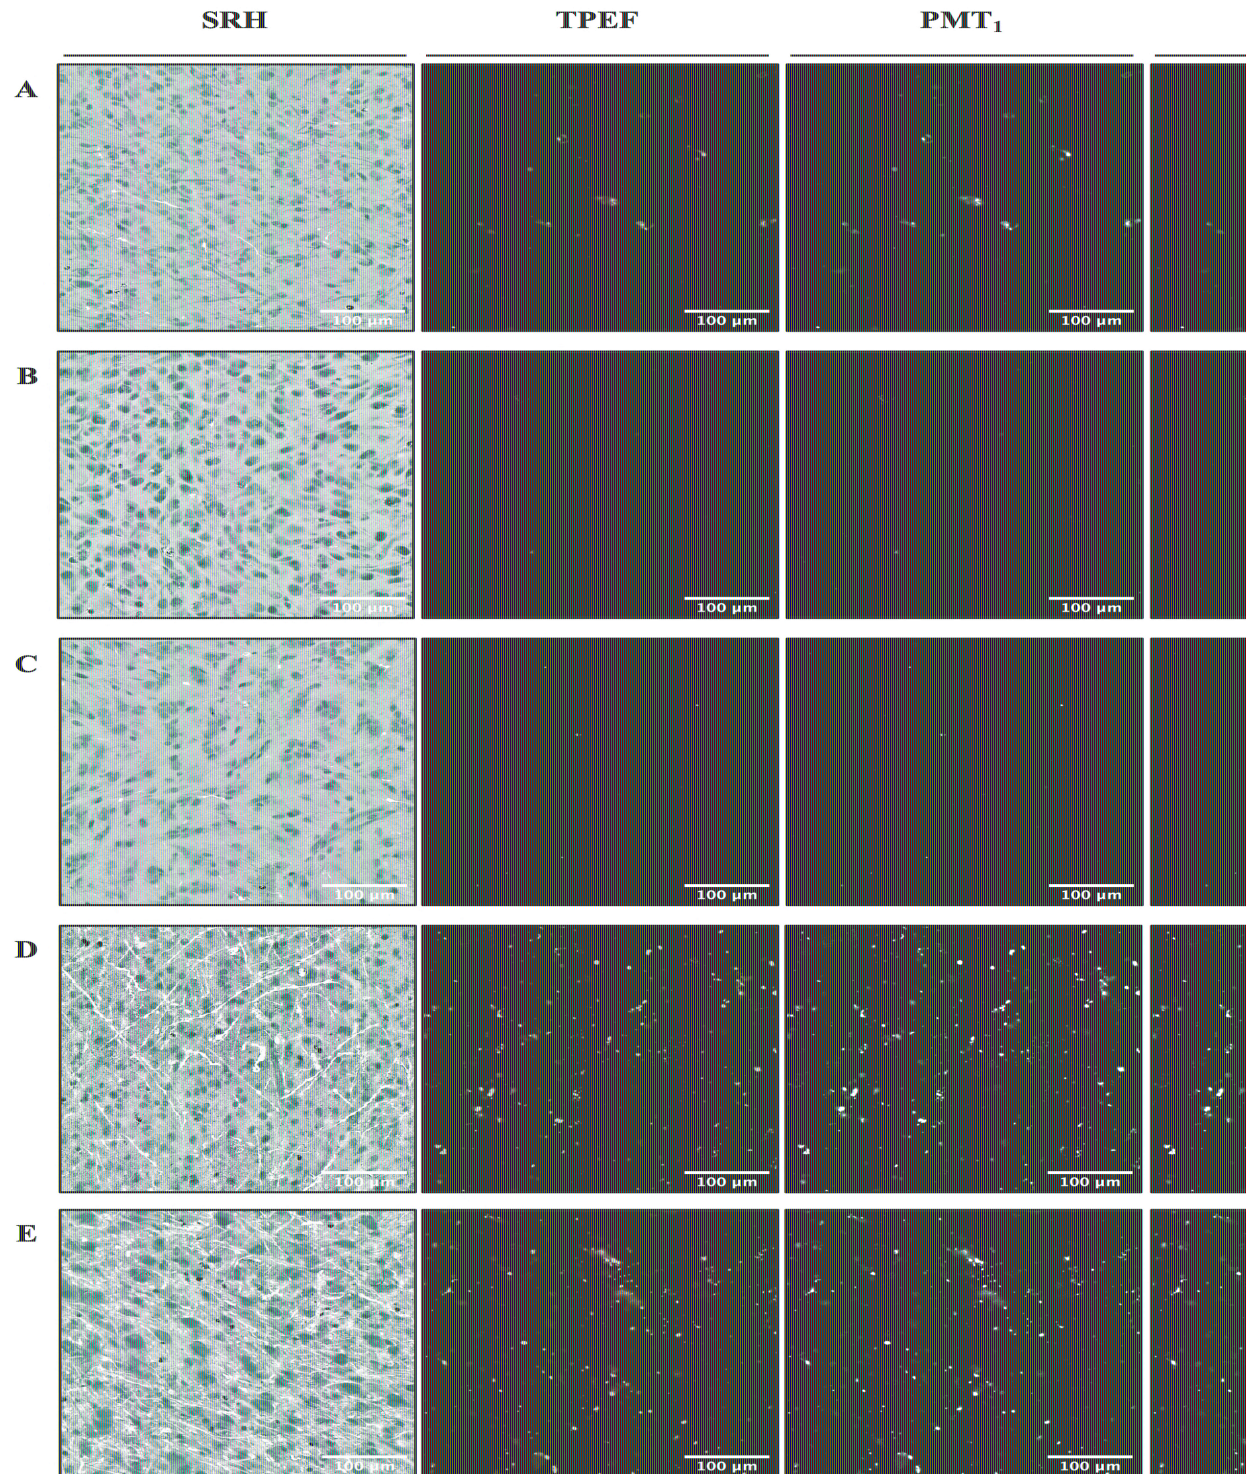

**Supplementary Fig. 5 | Paired SRH/TPEF imaging in high grade glioma patients who did not receive 5-ALA.** These negative control SRH/TPEF image pairs demonstrate a variable degree of autofluorescence where signal is present in both PMT1 and PMT2 channels in the absence of PMT1-specific signal. (a, patient 71; b, patient 72; c, patient 73; d, patient 74; e, patient 75).

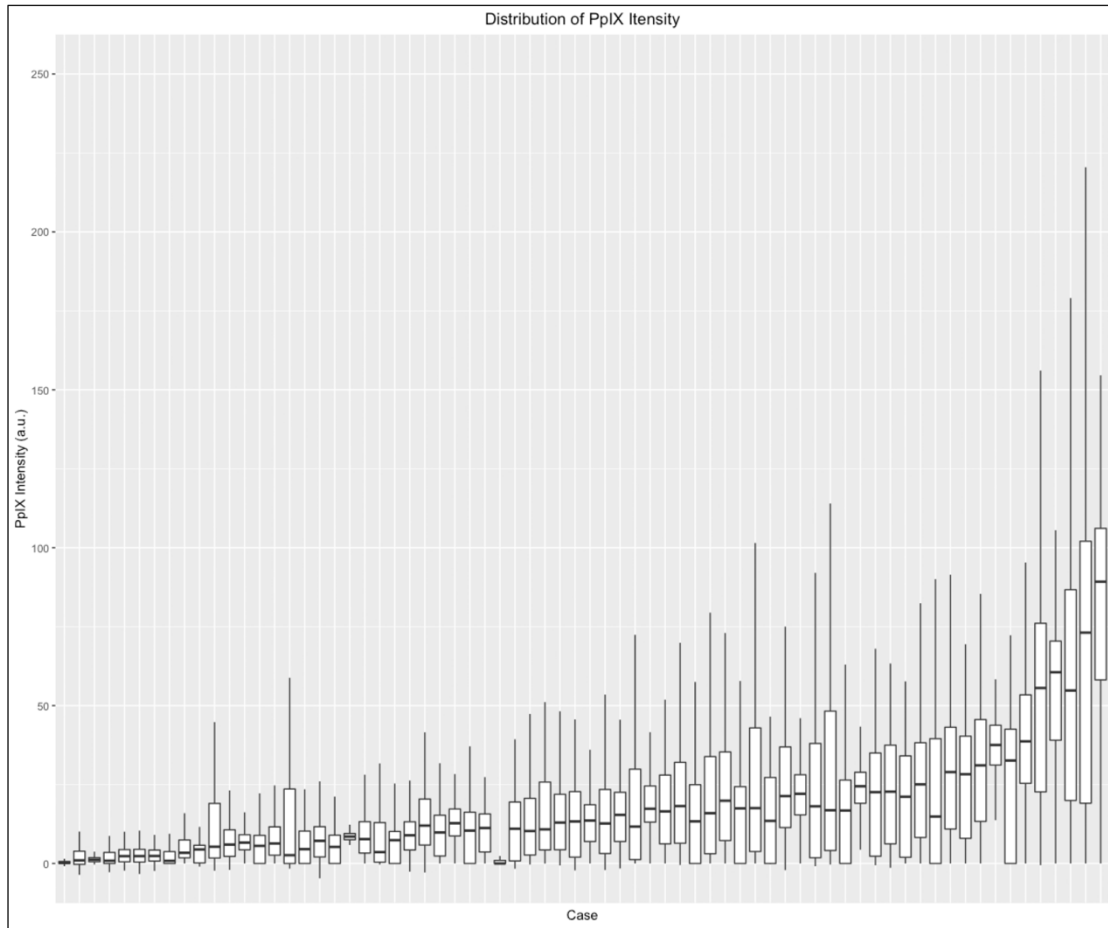

**Supplementary Fig. 6 | Distribution of PpIX intensity across each patient's imaged field of views.** The boxplot for each patient demonstrates the variation of PpIX accumulation and intensity within and between patients. Each box ranges from the first quartile to the third quartile of the distribution and the median is marked by a line across the box. The lines extending from each box represent  $\pm 1.5 \times$  interquartile range.



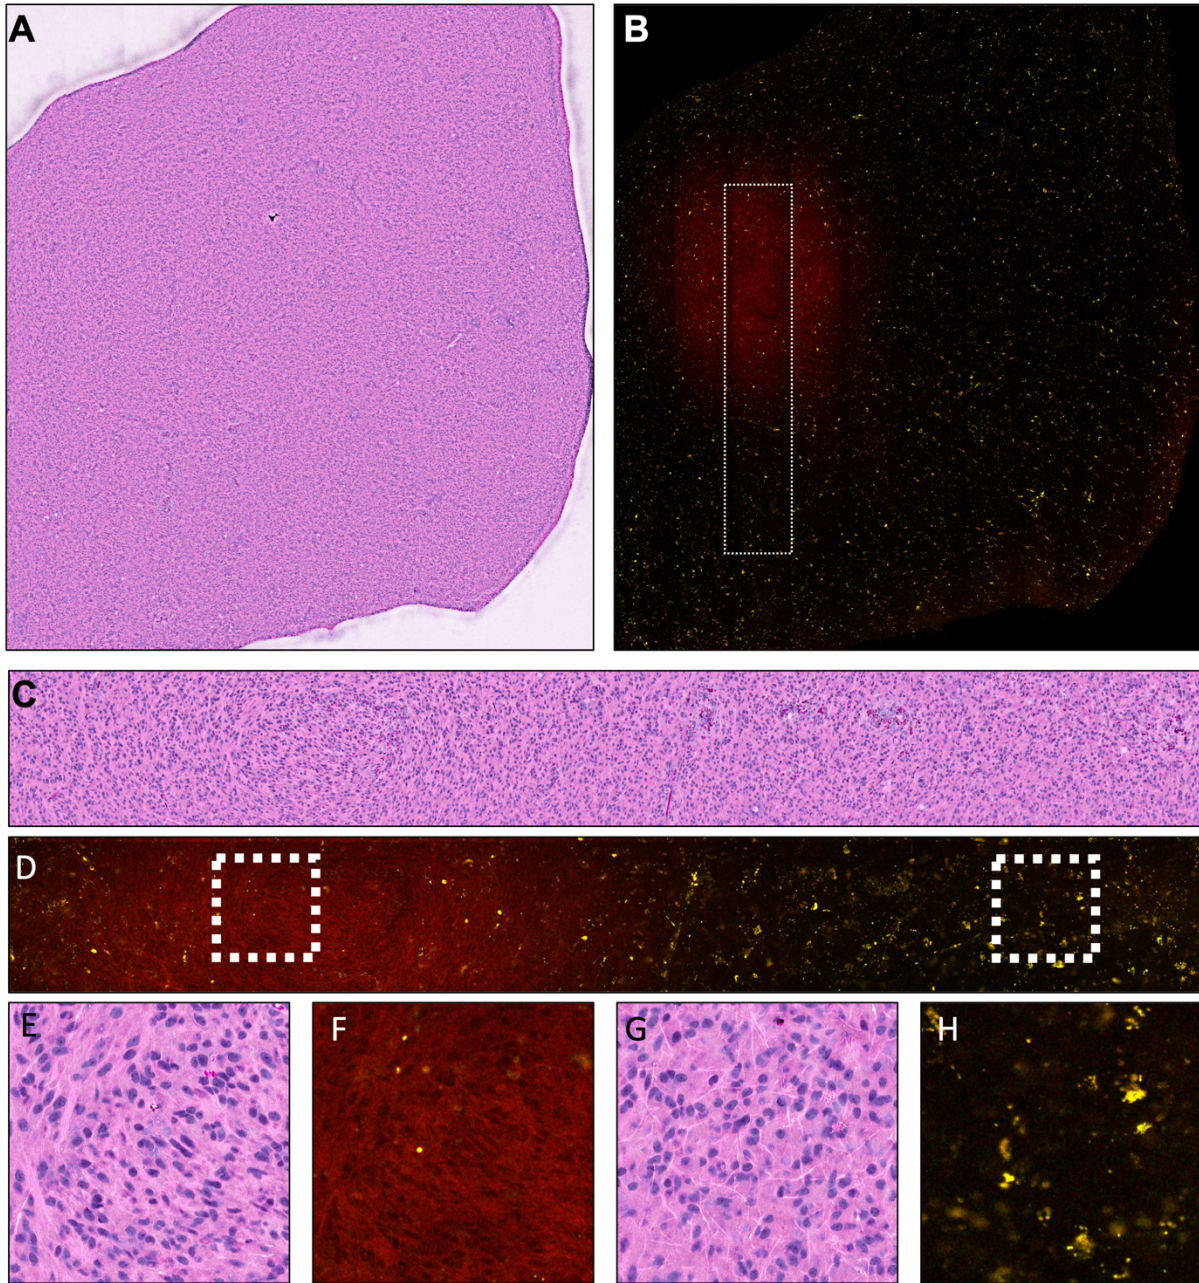

**Supplementary Fig. 7 | Intra-specimen variation of PpIX accumulation.** SRH/TPEF imaging reveals the heterogeneity of PpIX accumulation within a given specimen of consistent cellular density. (a) SRH imaging reveals a highly cellular tumor specimen. (b) TPEF imaging reveals that the tumor specimen contains a weak autofluorescence throughout with a small focus of PpIX accumulation. (c) A strip of the SRH imaging reveals the cellular density is consistent throughout. (d) A strip of TPEF imaging of the same area reveals that the transition from diffuse bright PpIX fluorescence to diffuse dim PpIX fluorescence to autofluorescence. (e) SRH imaging of the diffuse bright region shows highly cellular tumor. (f) TPEF imaging reveals diffuse bright fluorescence. (g) SRH imaging of the autofluorescence region shows cellular density equivalent to that in E. (h) TPEF imaging reveals autofluorescence.



## AXONAL PPIX ACCUMULATION ATLAS

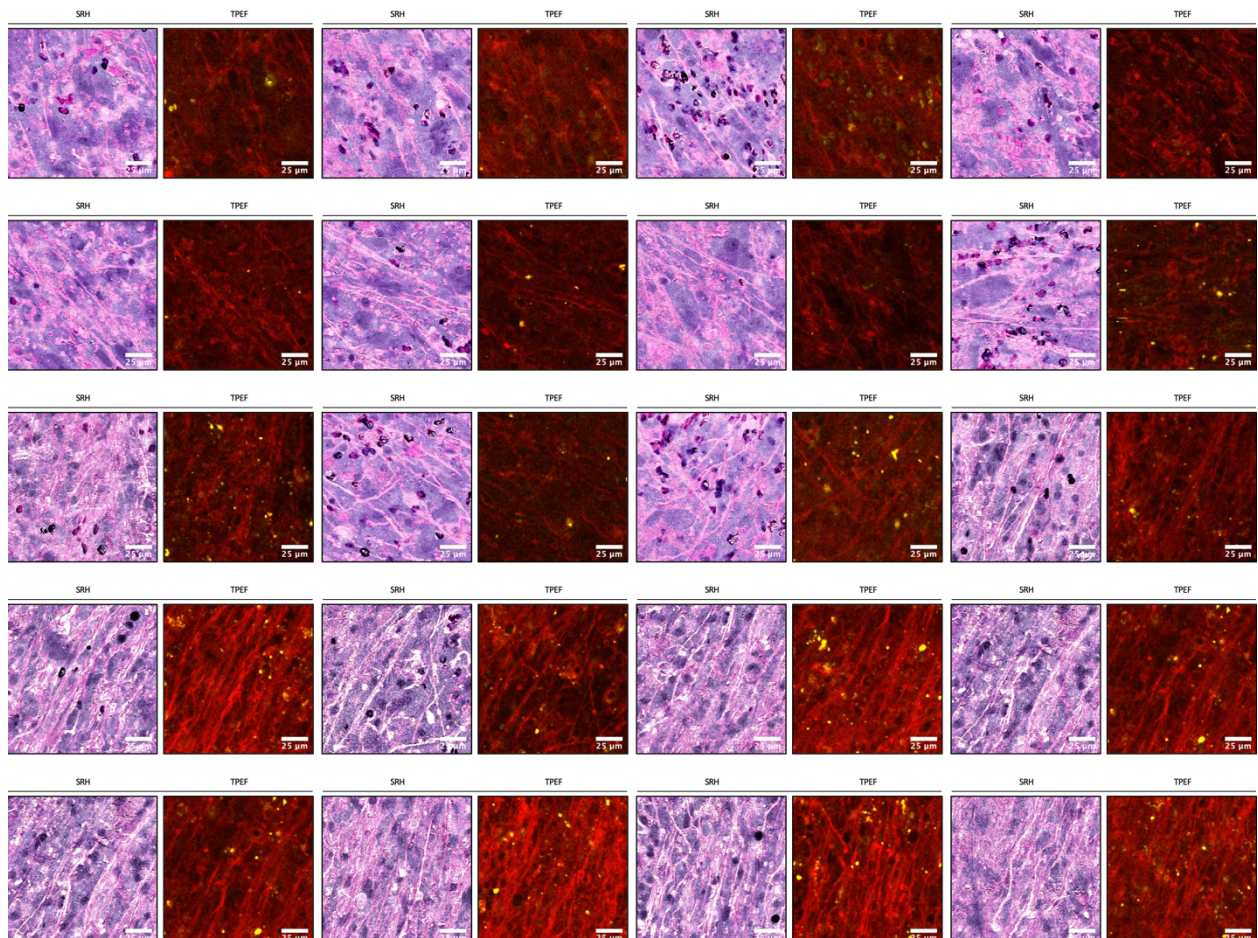

**Supplementary Fig. 8 | Atlas of axonal accumulation of PpIX.** Axonal accumulation of PpIX is readily apparent and marked by linear structures with strong PMT-1 signal in the 20 shown fields of view. Axonal accumulation was present in 935 of 166,743 fields of view across the study.



## CYTOPLASMIC PPIX ACCUMULATION ATLAS

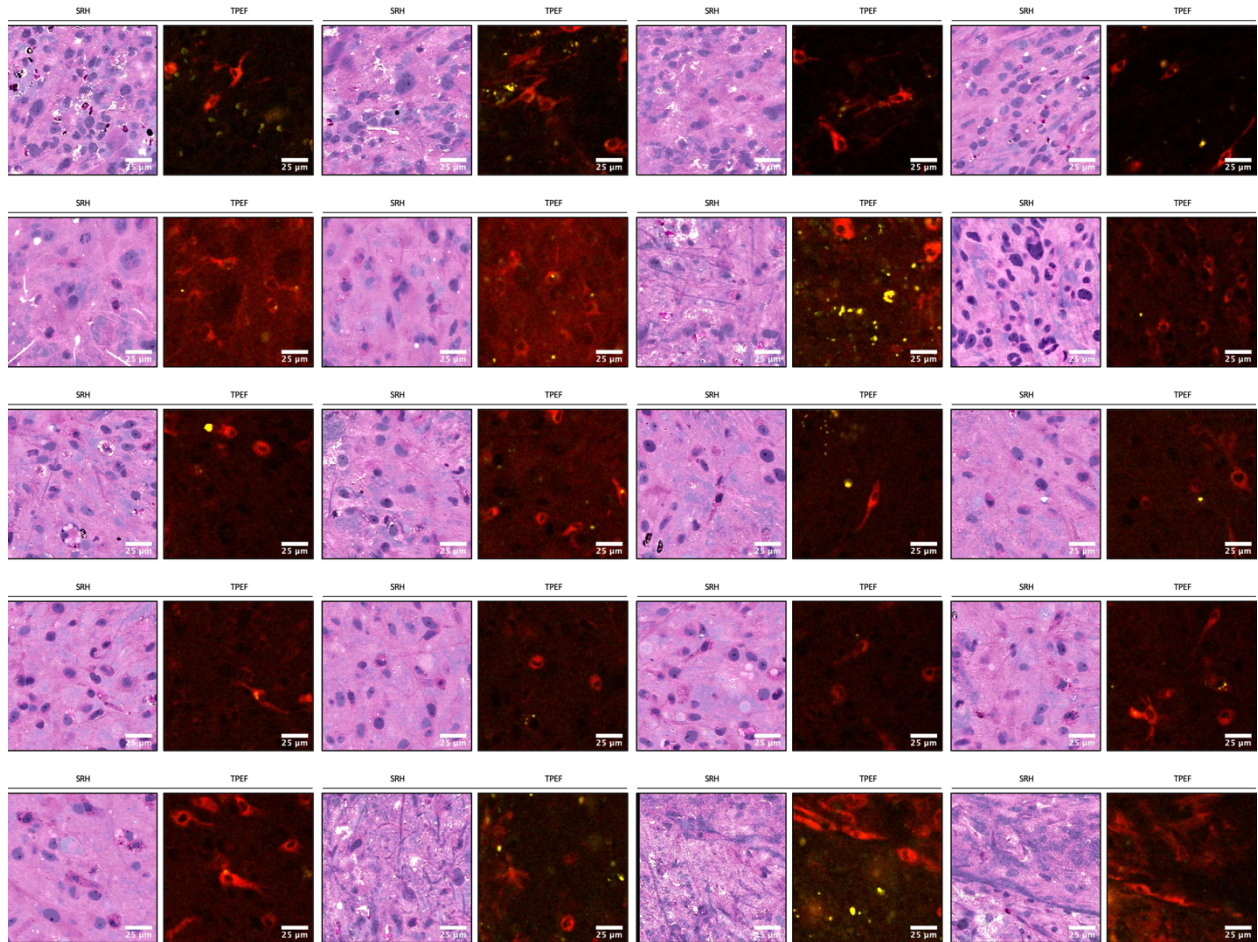

**Supplementary Fig. 9 | Atlas of cytoplasmic accumulation of PpIX.** Cytoplasmic accumulation of PpIX is focally present in a subset of cells amongst imaged specimens. 20 prototypic examples of cytoplasmic accumulation of PpIX are shown here. Cytoplasmic accumulation was present in 19,057 of 166,743 fields of view collected in this study.

## PERIVASCULAR CELL ATLAS

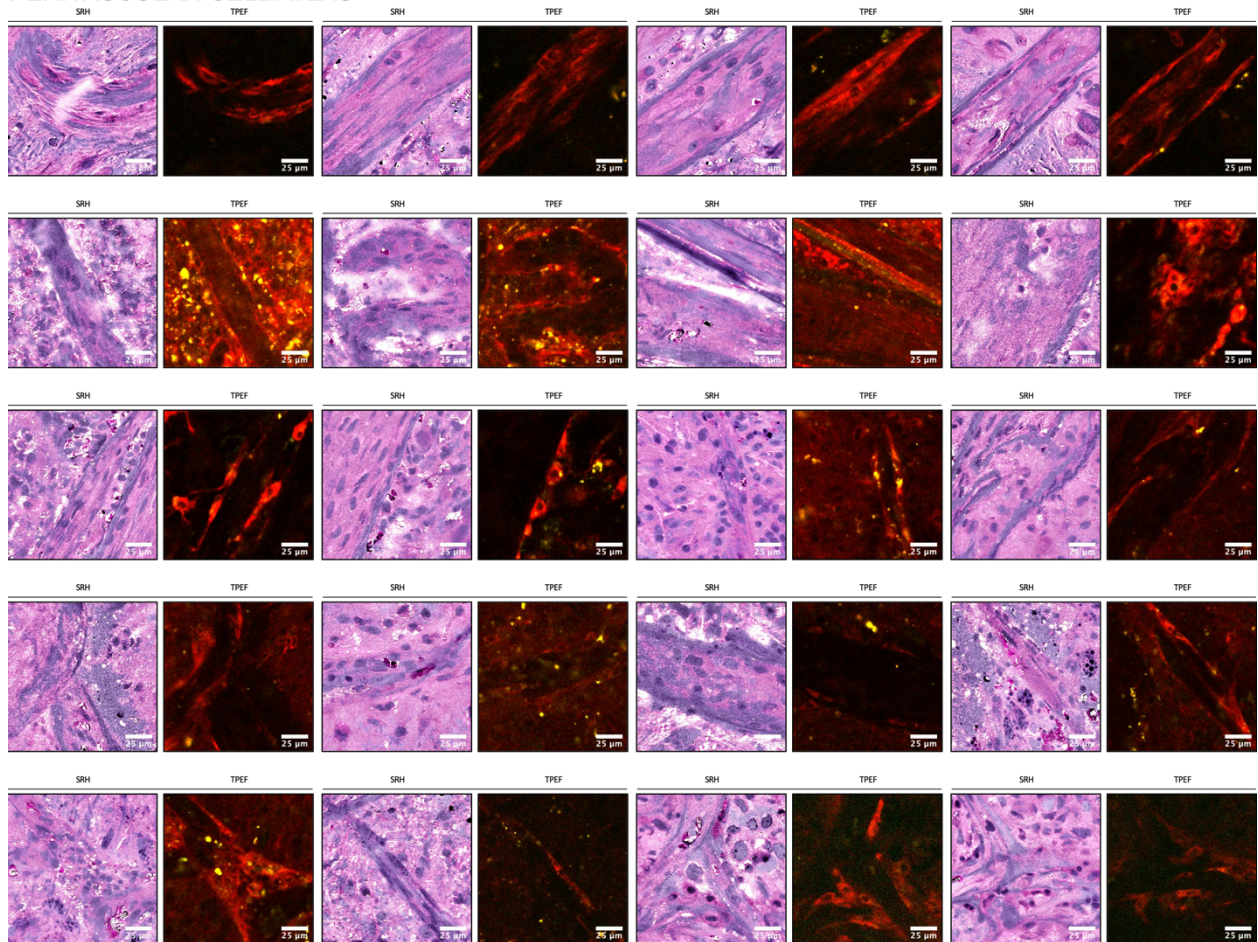

**Supplementary Fig. 10 | Atlas of perivascular cytoplasmic accumulation of PpIX.** Cytoplasmic accumulation of PpIX is focally present in a subset of cells with a strong PMT-1 signal and that are close to blood vessels. Cytoplasmic accumulation is present in 510 of 166,743 fields of view.

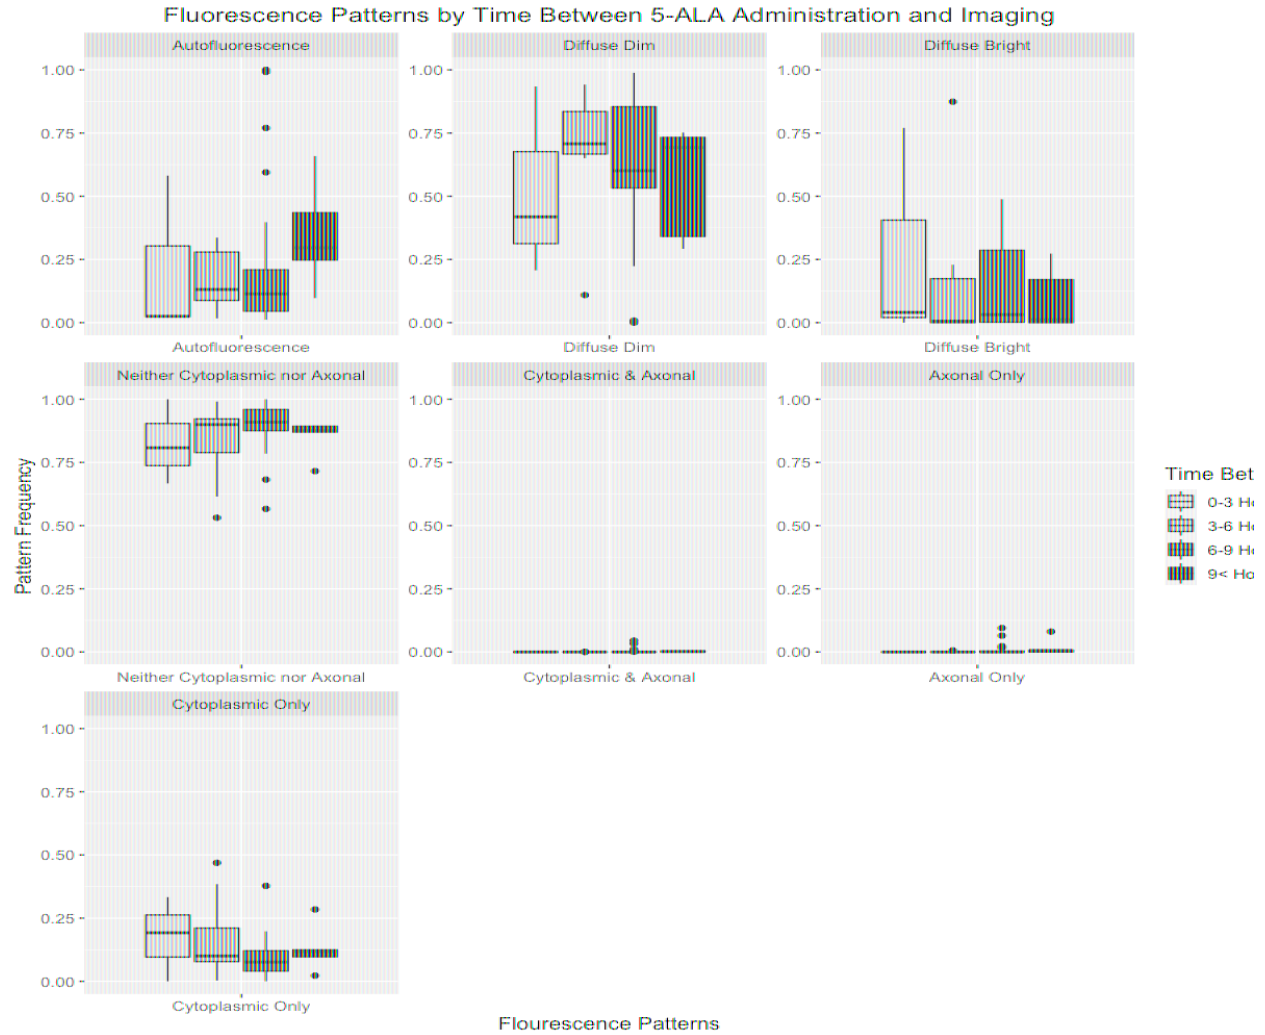

**Supplementary Fig. 11 Frequency of fluorescence patterns by time between 5-ALA administration and TPEF Imaging.** The boxplots shown for each fluorescence pattern demonstrates the variation in the proportion of FOVs demonstrating the given fluorescence pattern in the given time window between 5-ALA administration and TPEF imaging. Each box ranges from the first quartile to the third quartile of the distribution and the median is marked by a line across the box. The lines extending from each box represent  $\pm 1.5 \times \text{interquartile range}$ .



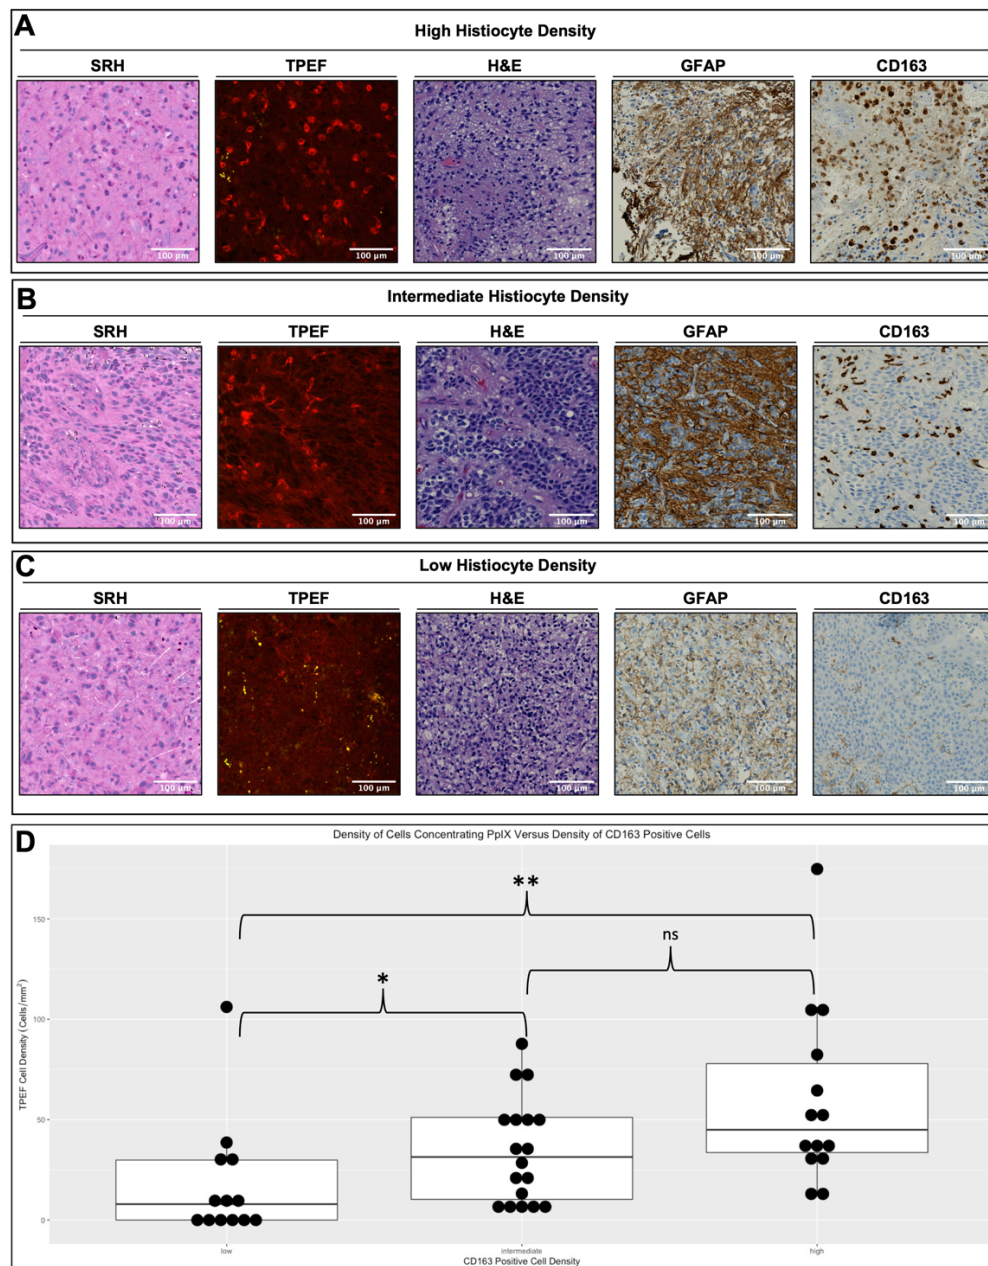

**Supplementary Fig. 12 | Relationship between cellular accumulation of PpIX and abundance of histiocytes.** A range of histiocyte density was encountered in the 70 patients enrolled. Specimens revealing hypercellular pleomorphic, high-grade glial neoplasms on SRH and conventional H&E reveal variations in the abundance of CD163 positive cells that correlate qualitatively with the abundance of cells with PpIX concentrated within the cytoplasm. Examples of high histiocyte density (a, patient 32), intermediate histiocyte density (b, patient 45) and low histiocyte density (c, patient 42) are shown here. The association of CD163 positivity and the number of cells with high PpIX cytoplasmic concentration is demonstrated in the study subjects with tissue available for CD163 staining (d, n=45). Cells concentrating PpIX in the cytoplasm were more abundant in specimens with intermediate (\*:  $p=0.02$ ) and high CD163 positivity (\*\*:  $p=0.002$ ) though there was no significant difference between PpIX cellularity comparing specimens with intermediate versus high CD163 positivity (n.s.: no statistical significance,  $p=0.06$ ). Each box ranges from the first quartile to the third quartile of the distribution and the median is marked by a line across the box. The lines extending from each box represent  $\pm 1.5 \times$  interquartile range.



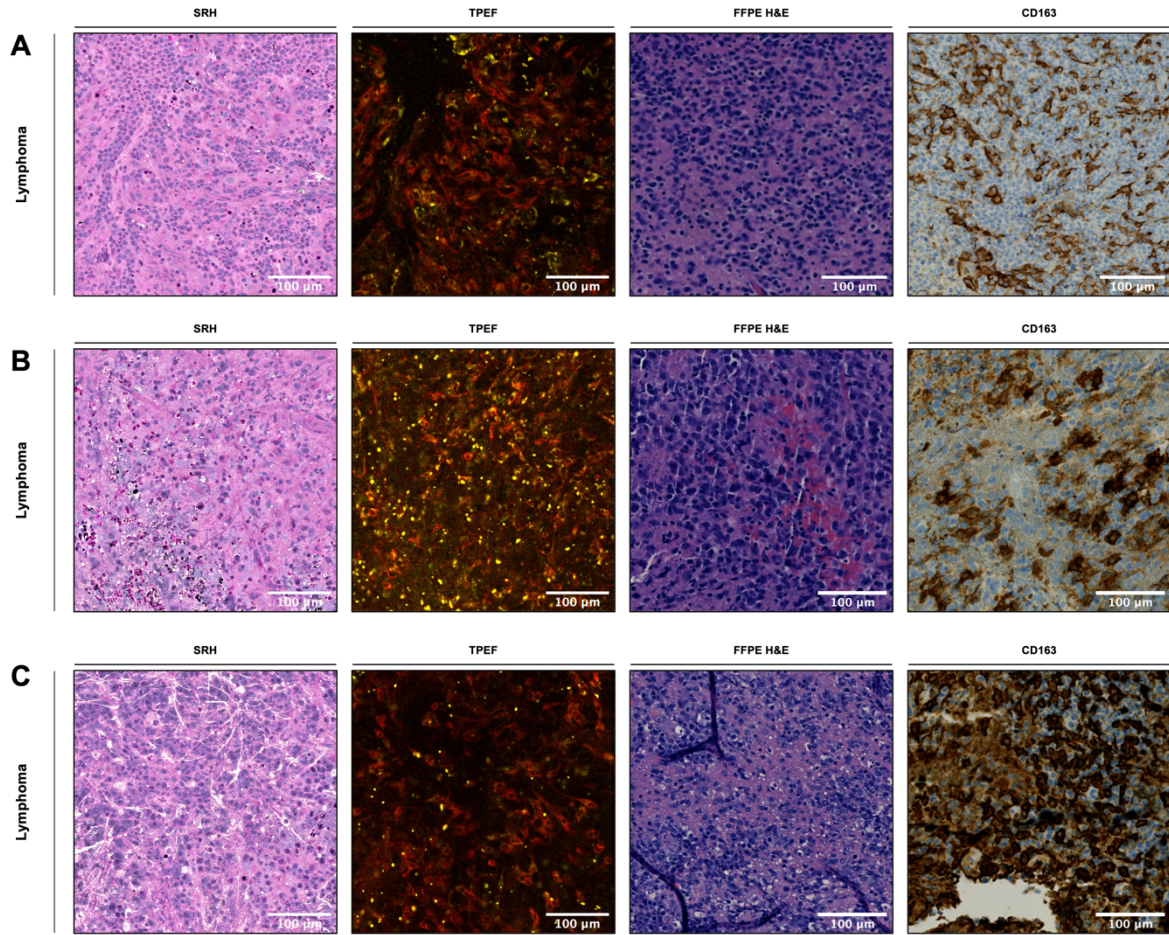

**Supplementary Fig. 13 | CD163 staining in lymphoma patients.** Cells accumulating PpIX in lymphoma specimens are morphologically consistent with those histiocytes present in high grade glioma specimens. Immunohistochemistry on the same specimens revealed CD163 positive cells with similar abundance to the PpIX accumulating cells in each of the three patients (a, patient 76; b, patient 77; c, Patient 78).

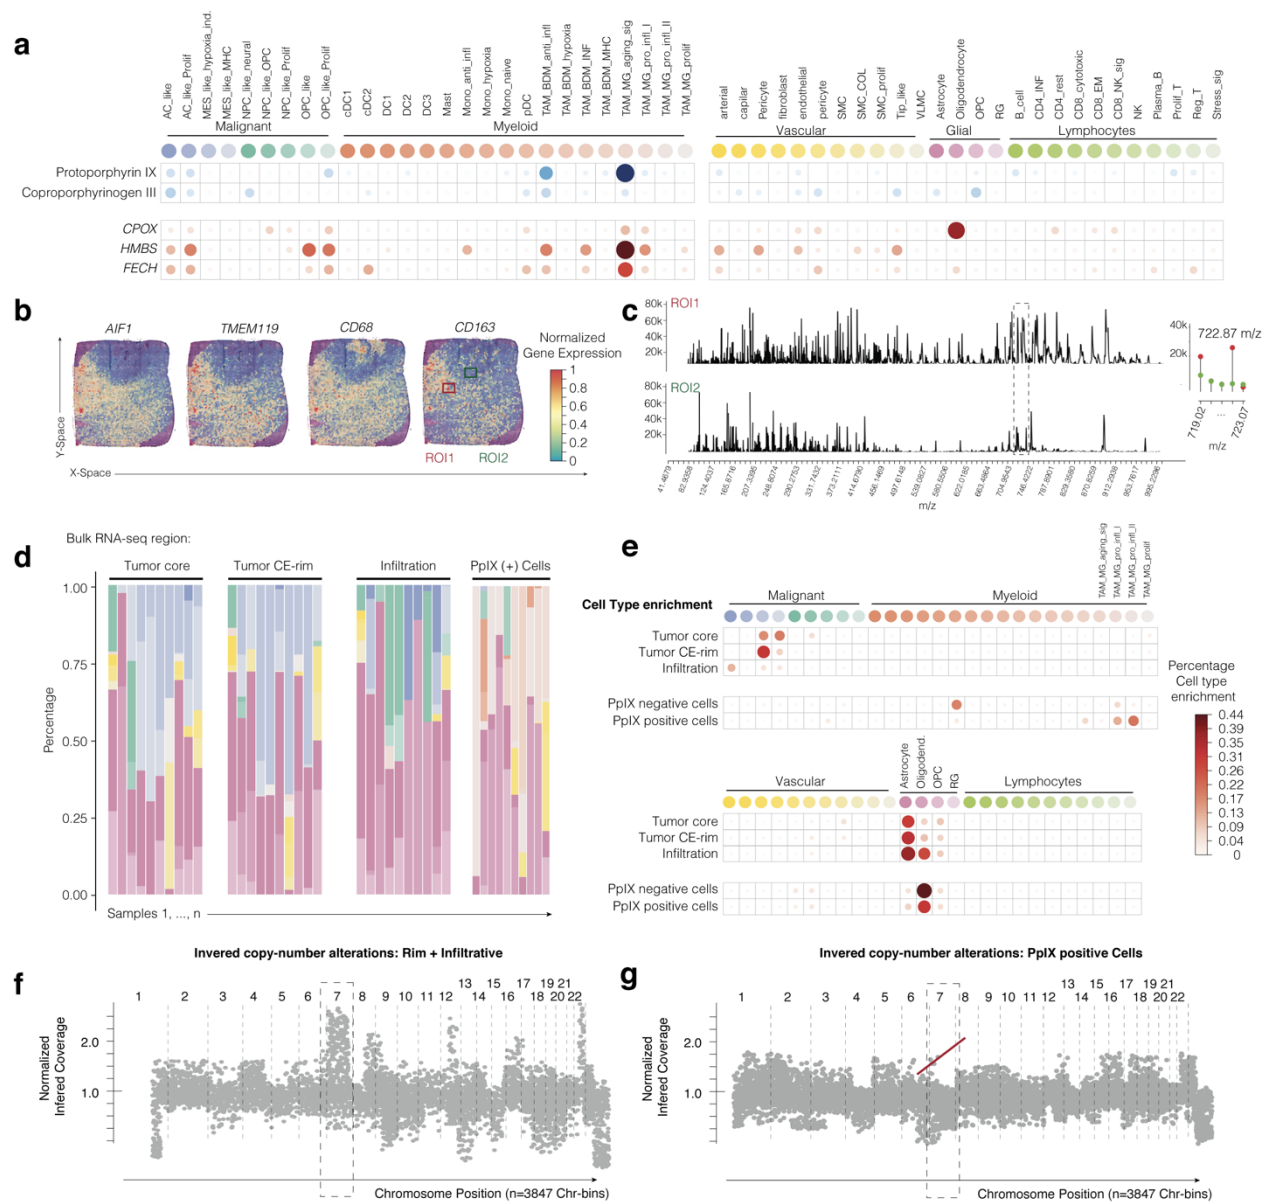

**Supplementary Fig. 14 | Additional Transcriptomic and metabolomic analysis of PpIX accumulating cells.** The spatially weighted correlation analysis of enzymes (red) and metabolites (blue) with cell type likelihood scores in six patients is displayed in the dot plot (a). The surface plot of myeloid gene expression is shown in (b). Mass spectra of selected ROIs (left) with high resolution of the PpIX peak at 722.6m/z are shown in (c). The cell composition of the bulk RNA-sequencing data is shown in the stacked bar graph (d). The percentage of cell type enrichment is shown in (e). The derived copy number profiles using SPATA2 toolbox for infiltrative tumor are shown in (f) and that for PpIX positive cells are shown in (g).



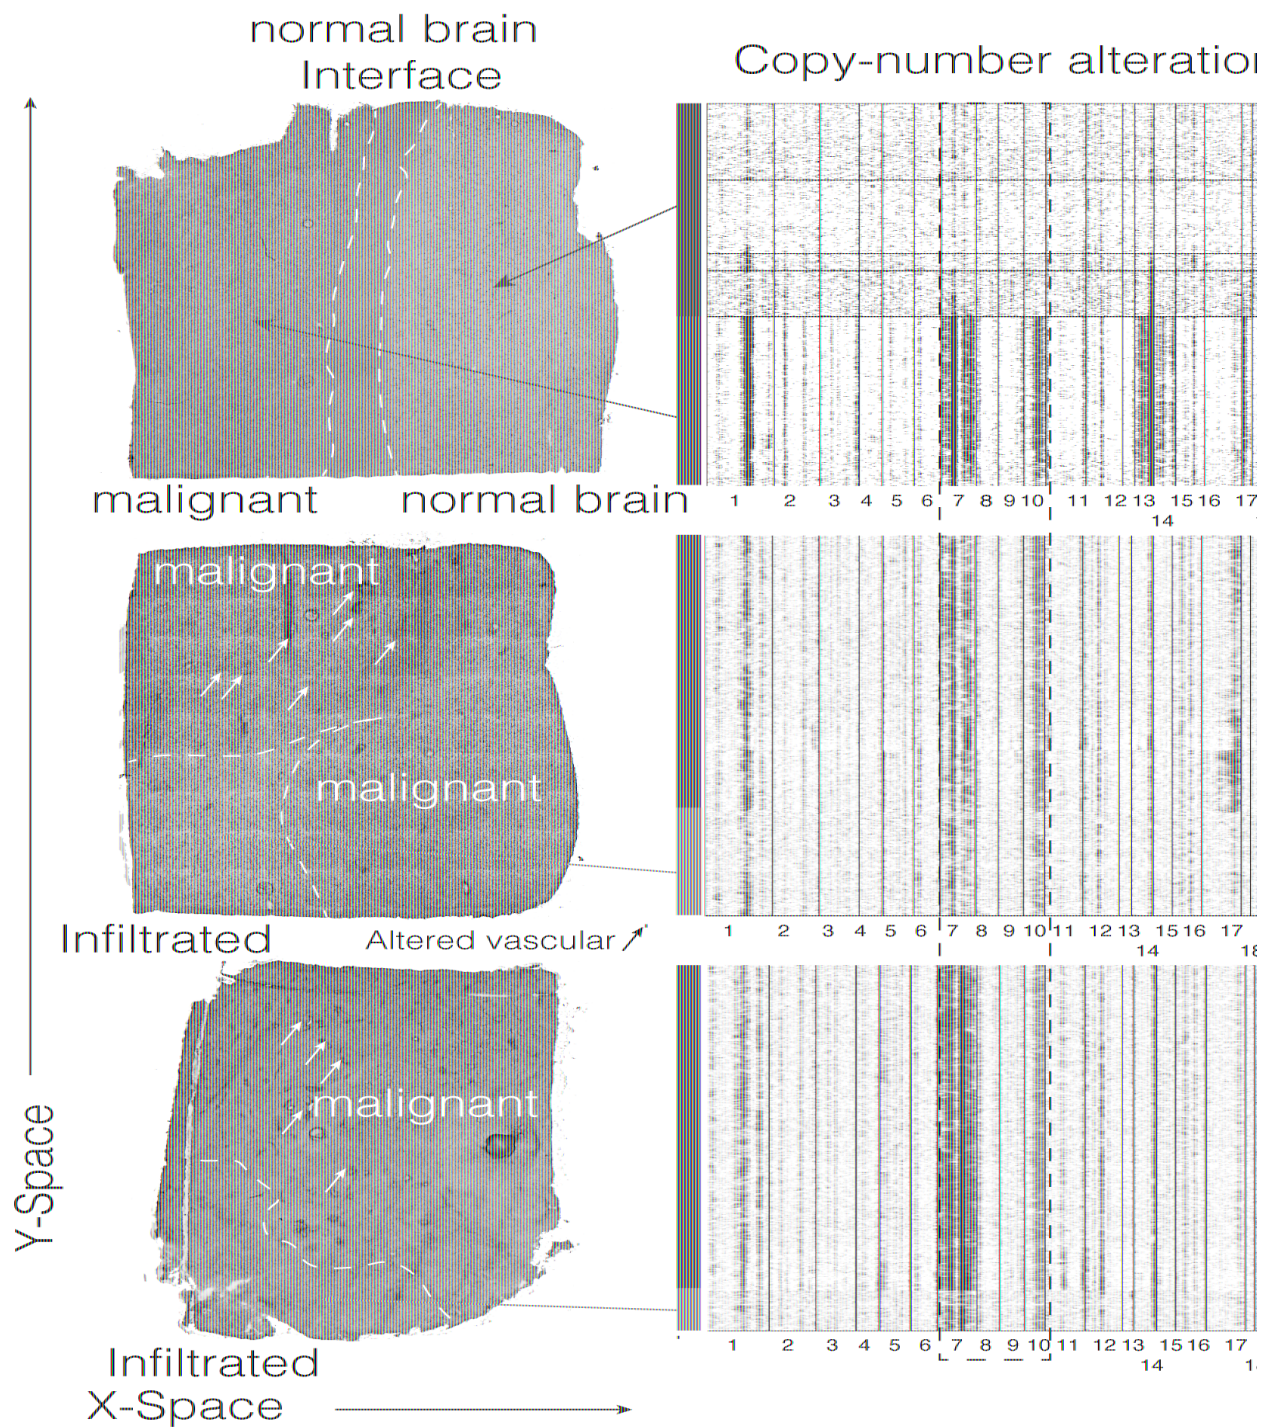

**Supplementary Fig. 15 | Copy Number Analysis of Tumor Sample.** On the left: H&E images of representative patients with distinct histological features. The arrows point to areas of vascular proliferation. On the right: heatmaps of the inferred copy number alterations (red: chromosome gain, blue: chromosome loss) of the representative samples. CNA analysis confirms the malignant and non-malignant parts of the sample. The color code on the CNA maps: red: malignant, orange: intermediate, green: infiltrative/normal.

| Patient | Institution | Age | Final Diagnosis                  | Grade      | WHO Molecular Information         | Recurrent     | Enhancement Pattern |
|---------|-------------|-----|----------------------------------|------------|-----------------------------------|---------------|---------------------|
| 1       | Muenster    | 71  | Glioblastoma                     | IV         | IDH wildtype                      | No            | Necrotic ring       |
| 2       | Muenster    | 58  | Glioblastoma                     | IV         | IDH wildtype                      | Yes           | Heterogeneous       |
| 3       | Muenster    | 50  | Glioblastoma                     | IV         | IDH wildtype                      | Yes           | Necrotic ring       |
| 4       | Muenster    | 43  | Glioblastoma                     | IV         | IDH wildtype                      | No            | Heterogeneous       |
| 5       | Muenster    | 64  | Glioblastoma                     | IV         | IDH wildtype                      | Yes           | Nodular             |
| 6       | Muenster    | 55  | Glioblastoma                     | IV         | IDH wildtype                      | Yes           | Heterogeneous       |
| 7       | Muenster    | 72  | Glioblastoma                     | IV         | IDH wildtype                      | Yes           | Necrotic ring       |
| 8       | NYU         | 25  | Glioblastoma                     | IV         | IDH wildtype                      | No            | Heterogeneous       |
| 9       | NYU         | 61  | Glioblastoma                     | IV         | IDH wildtype                      | No            | Nodular             |
| 10      | NYU         | 54  | Anaplastic astrocytoma           | III        | IDH wildtype                      | No            | Heterogeneous       |
| 11      | NYU         | 54  | Glioblastoma                     | IV         | IDH wildtype                      | No            | Necrotic ring       |
| 12      | NYU         | 53  | Glioblastoma                     | IV         | IDH wildtype                      | No            | Heterogeneous       |
| 13      | NYU         | 71  | Glioblastoma                     | IV         | IDH wildtype                      | No            | Necrotic ring       |
| 14      | NYU         | 54  | Glioblastoma                     | IV         | IDH wildtype                      | No            | Necrotic ring       |
| 15      | NYU         | 53  | Glioblastoma                     | IV         | IDH wildtype; 1p intact, 19q loss | No            | Necrotic ring       |
| 16      | NYU         | 67  | Glioblastoma                     | IV         | IDH wildtype                      | No            | Necrotic ring       |
| 17      | NYU         | 54  | Glioblastoma                     | IV         | IDH wildtype                      | No            | Homogeneous         |
| 18      | NYU         | 62  | Glioblastoma                     | IV         | IDH wildtype                      | No            | Necrotic ring       |
| 19      | NYU         | 42  | Glioblastoma                     | IV         | IDH wildtype                      | No            | Necrotic ring       |
| 20      | NYU         | 74  | Glioblastoma                     | IV         | IDH wildtype                      | No            | Necrotic ring       |
| 21      | NYU         | 63  | Glioblastoma                     | IV         | IDH wildtype                      | No            | Heterogeneous       |
| 22      | NYU         | 27  | High grade glioma                | High grade | IDH wildtype, 1p19q intact        | No            | Necrotic ring       |
| 23      | NYU         | 48  | Glioblastoma                     | IV         | IDH wildtype, 1p19q intact        | No            | Necrotic ring       |
| 24      | NYU         | 33  | Glioblastoma                     | IV         | IDH wildtype                      | No            | Necrotic ring       |
| 25      | NYU         | 69  | Glioblastoma                     | IV         | IDH wildtype                      | No            | Necrotic ring       |
| 26      | NYU         | 46  | Glioblastoma                     | IV         | IDH wildtype; 1p intact, 19q loss | No            | Necrotic ring       |
| 27      | NYU         | 52  | Glioblastoma                     | IV         | IDH wildtype                      | No            | Necrotic ring       |
| 28      | NYU         | 58  | Glioblastoma                     | IV         | IDH wildtype                      | No            | Necrotic ring       |
| 29      | NYU         | 73  | Glioblastoma                     | IV         | IDH wildtype, 1p19q intact        | No            | Necrotic ring       |
| 30      | NYU         | 54  | Glioblastoma                     | IV         | IDH wildtype, 1p19q intact        | No            | Necrotic ring       |
| 31      | NYU         | 59  | Glioblastoma                     | IV         | IDH wildtype                      | No            | Necrotic ring       |
| 32      | NYU         | 54  | Glioblastoma                     | IV         | IDH wildtype                      | No            | Necrotic ring       |
| 33      | NYU         | 46  | Glioblastoma                     | IV         | IDH wildtype, 1p19q intact        | Yes           | Heterogeneous       |
| 34      | NYU         | 76  | Glioblastoma                     | IV         | IDH wildtype                      | No            | Nodular             |
| 35      | NYU         | 74  | Glioblastoma                     | IV         | IDH wildtype                      | No            | Necrotic ring       |
| 36      | NYU         | 52  | Glioblastoma                     | IV         | IDH wildtype, 1p19q intact        | No            | Necrotic ring       |
| 37      | NYU         | 65  | Glioblastoma                     | IV         | IDH wildtype                      | No            | Homogeneous         |
| 38      | NYU         | 85  | Glioblastoma                     | IV         | IDH wildtype                      | No            | Heterogeneous       |
| 39      | NYU         | 65  | Glioblastoma                     | IV         | IDH wildtype                      | No            | Homogeneous         |
| 40      | NYU         | 64  | Glioblastoma                     | IV         | IDH wildtype, 1p19q intact        | No            | Necrotic ring       |
| 41      | NYU         | 70  | Glioblastoma                     | IV         | IDH wildtype                      | No            | Necrotic ring       |
| 42      | NYU         | 55  | Glioblastoma                     | IV         | IDH wildtype                      | No            | Necrotic ring       |
| 43      | NYU         | 46  | Glioblastoma                     | IV         | IDH wildtype                      | Yes           | Necrotic ring       |
| 44      | NYU         | 73  | Glioblastoma                     | IV         | IDH wildtype, 1p19q intact        | No            | Necrotic ring       |
| 45      | NYU         | 18  | Anaplastic neuroepithelial tumor | N/A        | IDH wildtype                      | No            | Heterogeneous       |
| 46      | NYU         | 27  | Astrocytoma                      | IV         | IDH mutated                       | No            | Nodular             |
| 47      | NYU         | 50  | Glioblastoma                     | IV         | IDH wildtype                      | No            | Necrotic ring       |
| 48      | NYU         | 49  | Glioblastoma                     | IV         | IDH wildtype; 1p intact, 19q loss | No            | Heterogeneous       |
| 49      | NYU         | 68  | Glioblastoma                     | IV         | IDH wildtype                      | No            | Necrotic ring       |
| 50      | NYU         | 52  | Glioblastoma                     | IV         | IDH wildtype                      | No            | Heterogeneous       |
| 51      | NYU         | 41  | Astrocytoma                      | IV         | IDH mutated, 1p19q intact         | No            | Heterogeneous       |
| 52      | NYU         | 35  | Astrocytoma                      | IV         | IDH wildtype, 1p19q intact        | No            | Homogeneous         |
| 53      | NYU         | 54  | Glioblastoma                     | IV         | IDH wildtype                      | No            | Necrotic ring       |
| 54      | Vienna      | 70  | Glioblastoma                     | IV         | IDH wildtype                      | Yes           | Necrotic ring       |
| 55      | Vienna      | 27  | Glioblastoma                     | IV         | IDH mutated                       | Yes           | Necrotic ring       |
| 56      | Vienna      | 67  | Glioblastoma                     | IV         | IDH wildtype                      | No            | Necrotic ring       |
| 57      | Vienna      | 80  | Glioblastoma                     | IV         | IDH wildtype                      | No            | Necrotic ring       |
| 58      | Vienna      | 43  | Anaplastic Astrocytoma           | III        | IDH mutated                       | No            | Heterogeneous       |
| 59      | Vienna      | 73  | Glioblastoma                     | IV         | IDH wildtype                      | No            | Necrotic ring       |
| 60      | Vienna      | 56  | Glioblastoma                     | IV         | IDH wildtype                      | Yes           | Necrotic ring       |
| 61      | Vienna      | 52  | Glioblastoma                     | IV         | IDH wildtype                      | No            | Necrotic ring       |
| 62      | Vienna      | 42  | Glioblastoma                     | IV         | IDH wildtype                      | No            | Necrotic ring       |
| 63      | Vienna      | 72  | Glioblastoma                     | IV         | IDH wildtype                      | No            | Necrotic ring       |
| 64      | Vienna      | 56  | Glioblastoma                     | IV         | IDH wildtype                      | No            | Necrotic ring       |
| 65      | Vienna      | 51  | Glioblastoma                     | IV         | IDH wildtype                      | Yes           | Necrotic ring       |
| 66      | Vienna      | 68  | Glioblastoma                     | IV         | IDH wildtype                      | No            | Necrotic ring       |
| 67      | Vienna      | 49  | Glioblastoma                     | IV         | IDH wildtype                      | No            | Necrotic ring       |
| 68      | Vienna      | 59  | Glioblastoma                     | IV         | IDH wildtype                      | No            | Necrotic ring       |
| 69      | Vienna      | 38  | Glioblastoma                     | IV         | IDH wildtype                      | No            | Necrotic ring       |
| 70      | Vienna      | 59  | Glioblastoma                     | IV         | IDH mutated                       | No            | Necrotic ring       |
| 71      | NYU         | 27  | Anaplastic Oligodendroglioma     | III        | Mutant                            | Co-deleted    | N/A                 |
| 72      | NYU         | 52  | Anaplastic Oligodendroglioma     | III        | Mutant                            | Co-deleted    | N/A                 |
| 73      | NYU         | 73  | Glioblastoma                     | IV         | Wild Type                         | Not performed | N/A                 |
| 74      | NYU         | 49  | Oligodendroglioma                | III        | Mutant                            | Co-deleted    | N/A                 |
| 75      | NYU         | 54  | Glioblastoma                     | IV         | Wild Type                         | Not performed | N/A                 |
| 76      | NYU         | 53  | Lymphoma                         | N/A        | N/A                               | No            | N/A                 |
| 77      | NYU         | 76  | Lymphoma                         | N/A        | N/A                               | No            | N/A                 |
| 78      | NYU         | 77  | Lymphoma                         | N/A        | N/A                               | No            | N/A                 |

**Supplementary Table 1 | Diagnostic information for study patients.**



| Effect                                                | Estimate | Std. Error | t value | Pr(> t ) | Significance |
|-------------------------------------------------------|----------|------------|---------|----------|--------------|
| Intercept                                             | 3.98701  | 1.13514    | 3.512   | 0.00112  | *            |
| Time between 5-ALA administration and Imaging (hours) | -0.09708 | 0.11843    | -0.82   | 0.41723  | ns           |
| Ki-67 Proliferation Index                             | 0.70876  | 1.59792    | 0.444   | 0.65976  | ns           |
| Homogeneous Enhancing Pattern                         | -1.19725 | 1.22103    | -0.981  | 0.33272  | ns           |
| Necrotic Ring Enhancing Pattern                       | 0.59407  | 0.63836    | 0.931   | 0.35763  | ns           |
| Nodular Enhancing Pattern                             | 0.94346  | 0.97506    | 0.968   | 0.33906  | ns           |
| Proportion of Enhancing Tumor                         | -2.27917 | 1.53576    | -1.484  | 0.14563  | ns           |

**Supplementary Table 2 | Fixed effects analysis of PpIX concentration in patient specimens.**

**Supplementary Video 1 | Pan/zoom around tissue with high cellularity and autofluorescence.**  
[YouTube](#)

**Supplementary Video 2 | Pan/zoom around tissue with high cellularity and diffuse dim PpIX fluorescence.**  
[YouTube](#)

**Supplementary Video 3 | Pan/zoom around tissue with high cellularity and diffuse bright PpIX fluorescence.**  
[YouTube](#)

**Supplementary Video 4 | Pan/zoom around tissue with high cellularity and diffuse dim PpIX fluorescence with cells concentrating PPIX.**  
[YouTube](#)

**Supplementary Video 5 | Pan/zoom around tissue with axonal accumulation of PpIX.**  
[YouTube](#)
